# Supplementary material for: Traffic-Related Air Pollution and Breast Cancer Risk: A Systematic Review and Meta-Analysis of Observational Studies
Source: MDPI journal article supplement (doi:10.3390/cancers15030927), 2023-02-01
Supplement: s1 [file s1]

## Supplementary materials

### Material S1: PRISMA checklist

| Section/topic                      | #  | Checklist item                                                                                                                                                                                                                                                                                              | Reported on page #        |
|------------------------------------|----|-------------------------------------------------------------------------------------------------------------------------------------------------------------------------------------------------------------------------------------------------------------------------------------------------------------|---------------------------|
| <b>TITLE</b>                       |    |                                                                                                                                                                                                                                                                                                             |                           |
| Title                              | 1  | Identify the report as a systematic review, meta-analysis, or both.                                                                                                                                                                                                                                         | 1                         |
| <b>ABSTRACT</b>                    |    |                                                                                                                                                                                                                                                                                                             |                           |
| Structured summary                 | 2  | Provide a structured summary including, as applicable: background; objectives; data sources; study eligibility criteria, participants, and interventions; study appraisal and synthesis methods; results; limitations; conclusions and implications of key findings; systematic review registration number. | 1                         |
| <b>INTRODUCTION</b>                |    |                                                                                                                                                                                                                                                                                                             |                           |
| Rationale                          | 3  | Describe the rationale for the review in the context of what is already known.                                                                                                                                                                                                                              | 2                         |
| Objectives                         | 4  | Provide an explicit statement of questions being addressed with reference to participants, interventions, comparisons, outcomes, and study design (PICOS).                                                                                                                                                  | 2                         |
| <b>METHODS</b>                     |    |                                                                                                                                                                                                                                                                                                             |                           |
| Protocol and registration          | 5  | Indicate if a review protocol exists, if and where it can be accessed (e.g., Web address), and, if available, provide registration information including registration number.                                                                                                                               | 2                         |
| Eligibility criteria               | 6  | Specify study characteristics (e.g., PICOS, length of follow-up) and report characteristics (e.g., years considered, language, publication status) used as criteria for eligibility, giving rationale.                                                                                                      | 3                         |
| Information sources                | 7  | Describe all information sources (e.g., databases with dates of coverage, contact with study authors to identify additional studies) in the search and date last searched.                                                                                                                                  | 3                         |
| Search                             | 8  | Present full electronic search strategy for at least one database, including any limits used, such that it could be repeated.                                                                                                                                                                               | 3 and Materials S2 and S3 |
| Study selection                    | 9  | State the process for selecting studies (i.e., screening, eligibility, included in systematic review, and, if applicable, included in the meta-analysis).                                                                                                                                                   | 3                         |
| Data collection process            | 10 | Describe method of data extraction from reports (e.g., piloted forms, independently, in duplicate) and any processes for obtaining and confirming data from investigators.                                                                                                                                  | 3                         |
| Data items                         | 11 | List and define all variables for which data were sought (e.g., PICOS, funding sources) and any assumptions and simplifications made.                                                                                                                                                                       | 3                         |
| Risk of bias in individual studies | 12 | Describe methods used for assessing risk of bias of individual studies (including specification of whether this was done at the study or outcome level), and how this information is to be used in any data synthesis.                                                                                      | 4                         |
| Summary measures                   | 13 | State the principal summary measures (e.g., risk ratio, difference in means).                                                                                                                                                                                                                               | 4                         |
| Synthesis of results               | 14 | Describe the methods of handling data and combining results of studies, if done, including measures of consistency (e.g., $I^2$ ) for each                                                                                                                                                                  | 4                         |

|                               |    |                                                                                                                                                                                                          |                                                        |
|-------------------------------|----|----------------------------------------------------------------------------------------------------------------------------------------------------------------------------------------------------------|--------------------------------------------------------|
|                               |    | meta-analysis.                                                                                                                                                                                           |                                                        |
| Risk of bias across studies   | 15 | Specify any assessment of risk of bias that may affect the cumulative evidence (e.g., publication bias, selective reporting within studies).                                                             | 4                                                      |
| Additional analyses           | 16 | Describe methods of additional analyses (e.g., sensitivity or subgroup analyses, meta-regression), if done, indicating which were pre-specified.                                                         | 4                                                      |
| <b>RESULTS</b>                |    |                                                                                                                                                                                                          |                                                        |
| Study selection               | 17 | Give numbers of studies screened, assessed for eligibility, and included in the review, with reasons for exclusions at each stage, ideally with a flow diagram.                                          | 5, Figure 1                                            |
| Study characteristics         | 18 | For each study, present characteristics for which data were extracted (e.g., study size, PICOS, follow-up period) and provide the citations.                                                             | 6, 7, 9 Table 1, Figure 2                              |
| Risk of bias within studies   | 19 | Present data on risk of bias of each study and, if available, any outcome level assessment (see item 12).                                                                                                | 21                                                     |
| Results of individual studies | 20 | For all outcomes considered (benefits or harms), present, for each study: (a) simple summary data for each intervention group (b) effect estimates and confidence intervals, ideally with a forest plot. | 21-23, Table 1, Figures 3 et 4                         |
| Synthesis of results          | 21 | Present results of each meta-analysis done, including confidence intervals and measures of consistency.                                                                                                  | 21-23, Figures 3 et 4                                  |
| Risk of bias across studies   | 22 | Present results of any assessment of risk of bias across studies (see Item 15).                                                                                                                          | 21                                                     |
| Additional analysis           | 23 | Give results of additional analyses, if done (e.g., sensitivity or subgroup analyses, meta-regression [see Item 16]).                                                                                    | 21, 22, 23, Table 2 and Tables S1 and S2 and Figure S1 |
| <b>DISCUSSION</b>             |    |                                                                                                                                                                                                          |                                                        |
| Summary of evidence           | 24 | Summarize the main findings including the strength of evidence for each main outcome; consider their relevance to key groups (e.g., healthcare providers, users, and policy makers).                     | 23                                                     |
| Limitations                   | 25 | Discuss limitations at study and outcome level (e.g., risk of bias), and at review-level (e.g., incomplete retrieval of identified research, reporting bias).                                            | 24,25, 26                                              |
| Conclusions                   | 26 | Provide a general interpretation of the results in the context of other evidence, and implications for future research.                                                                                  | 25, 26                                                 |
| <b>FUNDING</b>                |    |                                                                                                                                                                                                          |                                                        |
| Funding                       | 27 | Describe sources of funding for the systematic review and other support (e.g., supply of data); role of funders for the systematic review.                                                               | 26                                                     |

From: Moher D, Liberati A, Tetzlaff J, Altman DG, The PRISMA Group (2009). Preferred Reporting Items for Systematic Reviews and Meta-Analyses: The PRISMA Statement. PLoS Med 6(7): e1000097. doi:10.1371/journal.pmed1000097 For more information, visit: [www.prisma-statement.org](http://www.prisma-statement.org).

**Material S2: Research algorithm for the systematic review of the literature on breast cancer risk and exposure to traffic-related pollution using Medline/PubMed**

*Filter: English, French, German, Italian, Human*

*Equation: #1 OR #2 OR #3 AND #4 NOT #5 AND #6*

Last search: June 2022

#1 "Air Pollution"[Mesh: noexp] OR "Air Pollution, Indoor"[Mesh] OR "Air Pollutants"[Mesh: noexp] OR Air Pollut\*[Tiab] OR Ambient Air[Tiab] OR Airborne Pollut\*[Tiab] OR Air Toxic\*[Tiab] OR Air quality[Tiab] OR "Environmental Exposure"[Mesh: noexp] OR ("Inhalation Exposure"[Mesh] OR Inhalation [Tiab] OR Inhale [Tiab] OR Inhaled [Tiab])

#2 "Vehicle Emissions"[Mesh] OR "Motor Vehicles"[Mesh] OR Traffic Pollut\*[Tiab] OR Emissions [Tiab] OR Exhaust [Tiab] OR Exhausts [Tiab] OR Fume [Tiab] OR Fumes [Tiab] OR ((Vehicle [Tiab] OR Vehicles [Tiab] OR Vehicular [Tiab] OR Auto [Tiab] OR Automobile [Tiab] OR Bus [Tiab] OR Buses [Tiab] OR Car [Tiab] OR Cars [Tiab] OR Truck [Tiab] OR Trucks [Tiab] OR Engine [Tiab] OR Transport [Tiab] OR Transportation [Tiab]) AND (Emissions [Tiab] OR Exhaust [Tiab] OR Fume [Tiab] OR Fumes [Tiab])) OR (Traffic [Tiab] NOT (Safety [Tiab] OR Accident\* [Tiab] OR Injur\* [Tiab] OR Collision\* [Tiab] OR Crash\*[Tiab])) OR ((Proximity [Tiab] OR Near [Tiab]) AND (Road [Tiab] OR Roadways [Tiab] OR Highway [Tiab] OR Highways [Tiab] OR Freeway [Tiab] OR Freeways [Tiab] OR Motorway [Tiab] OR Motorways [Tiab]))

#3 "Particulate Matter"[Mesh] OR Particulate Matter [Tiab] OR PM2.5 [Tiab] OR "PM(2.5)" [Tiab] OR PM10 [Tiab] OR "PM(10)" [Tiab] OR "Soot"[Mesh] OR Soot [Tiab] OR "black carbon" [Tiab] OR "Benzo(a)pyrene"[Mesh] OR Benzene [Mesh] OR "Benzopyrene" [Tiab] OR "Benzo(a)pyrene"[Tiab] OR "3, 4-Benzopyrene" [Tiab] OR Benzene [Tiab] OR "Nitrogen Dioxide"[Mesh] OR Nitrogen Dioxide\* [Tiab] OR "NO(x)" [Tiab] OR NOx [Tiab] OR NO2 [Tiab] OR Nitrogen Oxide\*[Tiab] OR Nitric Oxide [Tiab] OR "Carbon Monoxide"[Mesh] OR "Carbon Monoxide"[Tiab] OR "Volatile Organic Compounds"[Mesh] OR "Volatile Organic Compounds"[Tiab]

#4 "Breast Neoplasms"[Mesh] OR Breast cancer [Tiab] OR (Cancer [Tiab] AND Breast [Tiab])

#5 Treatment[Tiab] OR Therapy[Tiab] OR Radiotherapy[Tiab] OR Chemotherapy[Tiab] OR Immunotherapy[Tiab] OR Tomography[Ti] OR Mammograph\*[ti] OR "Mammography"[Mesh] OR Imaging[Ti] OR "Sentinel Lymph Node Biopsy"[Mesh] OR Mastectomy[Ti] OR Nanoparticle[Ti] OR "Cell Line"[Mesh] OR Cell[Tiab] RNA[Ti] OR Management[Ti] OR Diagnosis[Ti] OR Prognosis[Mesh] OR Scintigraph\*[Ti]

#6 "Clinical Trials as Topic"[Mesh] OR "Case-Control Studies"[Mesh] OR "Cohort Studies"[Mesh] OR "Cross-Sectional Studies"[Mesh] OR "Multicenter Studies as Topic"[Mesh] OR "Retrospective Studies"[Mesh] OR "Epidemiology"[Mesh] OR "Epidemiology" [Subheading]

**Material S3: Research algorithm for the systematic review of the literature on breast cancer risk and exposure to traffic-related pollution using Web of science**

*Filter: English, Article*

*Equation: (((#1 OR #2 OR #3) AND #4) NOT #5) AND #6*

Last search: June 2022

#1

TS=(“Air Pollution” OR “Air Pollutants” OR “Environmental Exposure” OR “Inhalation Exposure”) OR TI=(Air Pollut\* OR Ambient Air OR Airborne Pollut\* OR Air Toxic\* OR Air quality) OR  
AB=(Air Pollut\* OR Ambient Air OR Airborne Pollut\* OR Air Toxic\* OR Air quality) OR  
AK=(Air Pollut\* OR Ambient Air OR Airborne Pollut\* OR Air Toxic\* OR Air quality)

#2

TS=(“Vehicle Emissions” OR “Motor Vehicles”) OR  
TI=(Traffic Pollut OR Emissions OR Exhaust OR Exhausts OR Fume OR Fumes) OR  
TI=((Vehic\* OR Automobile OR Bus OR Buses OR Car OR Cars OR Truck OR Trucks OR Engine OR Transport OR Transportation) AND (Emissions OR Exhaust OR Fume OR Fumes)) OR  
TI=(Traffic NOT (Safety OR Accident\* OR Injur\* OR Collision\* OR Crash\*) ) OR  
TI=((Proximity OR “Near”) AND (Road OR Roadways OR Highway OR Highways OR Freeway OR Freeways OR Motorway OR Motorways))

#3

TS=(“Particulate Matter” OR “PM<sub>2.5</sub>” OR “PM(2.5)” OR PM10 OR “PM(10)” OR Soot OR “black carbon” OR “Benzo(a)pyrene” OR Benzene OR “Nitrogen Dioxide” OR “Carbon Monoxide” OR “Volatile Organic Compounds”) OR  
TI=(“Particulate Matter” OR “PM<sub>2.5</sub>” OR “PM(2.5)” OR PM10 OR “PM(10)” OR Soot OR “black carbon” OR “Benzo(a)pyrene” OR “Benzopyrene” OR “Benzo(a)pyrene” OR Benzene OR “3, 4-Benzopyrene” OR “Nitrogen Dioxide” OR “NO(x)” OR NO<sub>x</sub> OR NO<sub>2</sub> OR “Nitrogen Oxide” OR “Nitric Oxide” OR “Carbon Monoxide” OR “Volatile Organic Compounds”)

#4

TS=(“Breast Neoplasms”) OR  
TI=(“Breast cancer” OR (Cancer AND Breast))

#5

TI=(Treatment OR Therapy OR Radiotherapy OR Chemotherapy OR Immunotherapy OR Tomography OR Mammograph\* OR “Mammography” OR Imaging OR “Sentinel Lymph Node Biopsy” OR Mastectomy OR Nanoparticle OR “Cell Line” OR RNA OR Management OR Diagnosis OR Prognosis OR Scintigraph\*)

#6

TS=(“Clinical Trials as Topic” OR “Case-Control Studies” OR “Cohort Studies” OR “Cross-Sectional Studies” OR “Multicenter Studies as Topic” OR “Retrospective Studies” OR “Epidemiology”)

**Table S1: Summary relative risks (RR) and 95% confidence interval (CI) of breast cancer for an increase of 10 µg/m<sup>3</sup> of NO<sub>2</sub>, overall and excluding one study at a time.**

|                                  | N studies | RR (95% CI)             | I <sup>2</sup> (%) | <i>p</i> for heterogeneity | ID of included articles <sup>a</sup> |
|----------------------------------|-----------|-------------------------|--------------------|----------------------------|--------------------------------------|
| Overall meta-estimate            | 13        | 1.0151 (1.0026, 1.0279) | 16.9               | 0.27                       | 1-6, 8-14                            |
| Excluding Amadou et al. 2022     | 12        | 1.0132 (1.0005, 1.0260) | 15.0               | 0.30                       | 1-6, 8-13                            |
| Excluding Lemarchand et al. 2021 | 12        | 1.0132 (1.0020, 1.0245) | 10.6               | 0.34                       | 1-6, 8-11, 13, 14                    |
| Excluding White et al. 2021      | 12        | 1.0180 (1.0041, 1.0321) | 19.3               | 0.25                       | 1-6, 8-11, 13, 14                    |
| Excluding Cheng et al. 2020      | 12        | 1.0166 (1.0022, 1.0312) | 23.8               | 0.21                       | 1-6, 8-14                            |
| Excluding Bai et al. 2019        | 12        | 1.0202 (1.0033, 1.0373) | 15.5               | 0.29                       | 1-6,8,9,11-14                        |
| Excluding Goldberg et al. 2019   | 12        | 1.0186 (1.0039, 1.0335) | 20.7               | 0.24                       | 1-6,8,10-14                          |
| Excluding White et al. 2019      | 12        | 1.0166 (1.0024, 1.0309) | 20.7               | 0.26                       | 1-6, 9-14                            |
| Excluding Datzmann et al. 2018   | 12        | 1.0090 (1.0009, 1.0172) | 0.0                | 0.79                       | 1-5, 8-14                            |
| Excluding Andersen et al. 2017b  | 12        | 1.0157 (1.0015, 1.0301) | 23.0               | 0.22                       | 1-4, 6, 8-14                         |
| Excluding Andersen et al. 2017a  | 12        | 1.0163 (1.0026, 1.0302) | 23.5               | 0.21                       | 1-3, 5, 6, 8-14                      |
| Excluding Goldberg et al. 2017   | 12        | 1.0156 (1.0023, 1.0292) | 22.7               | 0.22                       | 1, 2, 4-6, 8-14                      |
| Excluding Hystad et al. 2015     | 12        | 1.0152 (1.0019, 1.0287) | 21.6               | 0.23                       | 1, 3-6, 8-14                         |
| Excluding Crouse et al. 2010     | 12        | 1.0146 (1.0024, 1.0270) | 8.6                | 0.36                       | 2-6, 8-13, 14                        |

<sup>a</sup> Study IDs are listed in Table 1

**Table S2: Summary relative risks (RR) and 95% confidence interval (CI) of breast cancer for an increase of 10  $\mu\text{g}/\text{m}^3$  of  $\text{NO}_2$ , cumulating studies by order of publication**

| ID of included articles <sup>a</sup> | N studies | RR (95% CI)             | I <sup>2</sup> (%) | <i>p</i> for heterogeneity |
|--------------------------------------|-----------|-------------------------|--------------------|----------------------------|
| 1,2,3                                | 3         | 1.0536 (0.9664, 1.1487) | 0.0                | 0.59                       |
| 1-4                                  | 4         | 1.0268 (0.9655, 1.0918) | 0.0                | 0.62                       |
| 1-5                                  | 5         | 1.0223 (0.9864, 1.0595) | 0.0                | 0.77                       |
| 1-6                                  | 6         | 1.0421 (1.0142, 1.0708) | 0.0                | 0.49                       |
| 1-6, 8                               | 7         | 1.0345 (1.0101, 1.0595) | 0.0                | 0.46                       |
| 1-6, 8,9                             | 8         | 1.0291 (1.0077, 1.0509) | 0.0                | 0.49                       |
| 1-6, 8-10                            | 9         | 1.0203 (1.0012, 1.0496) | 9.4                | 0.36                       |
| 1-6, 8-11                            | 10        | 1.0134 (1.0011, 1.0260) | 10.8               | 0.34                       |
| 1-6, 8-12                            | 11        | 1.0111 (1.0004, 1.0219) | 7.2                | 0.37                       |
| 1-6, 8-13                            | 12        | 1.0132 (1.0005, 1.0260) | 15.0               | 0.30                       |
| 1-6, 8-14                            | 13        | 1.0151 (1.0026, 1.0279) | 16.9               | 0.27                       |

<sup>a</sup> Study IDs are listed in Table 1

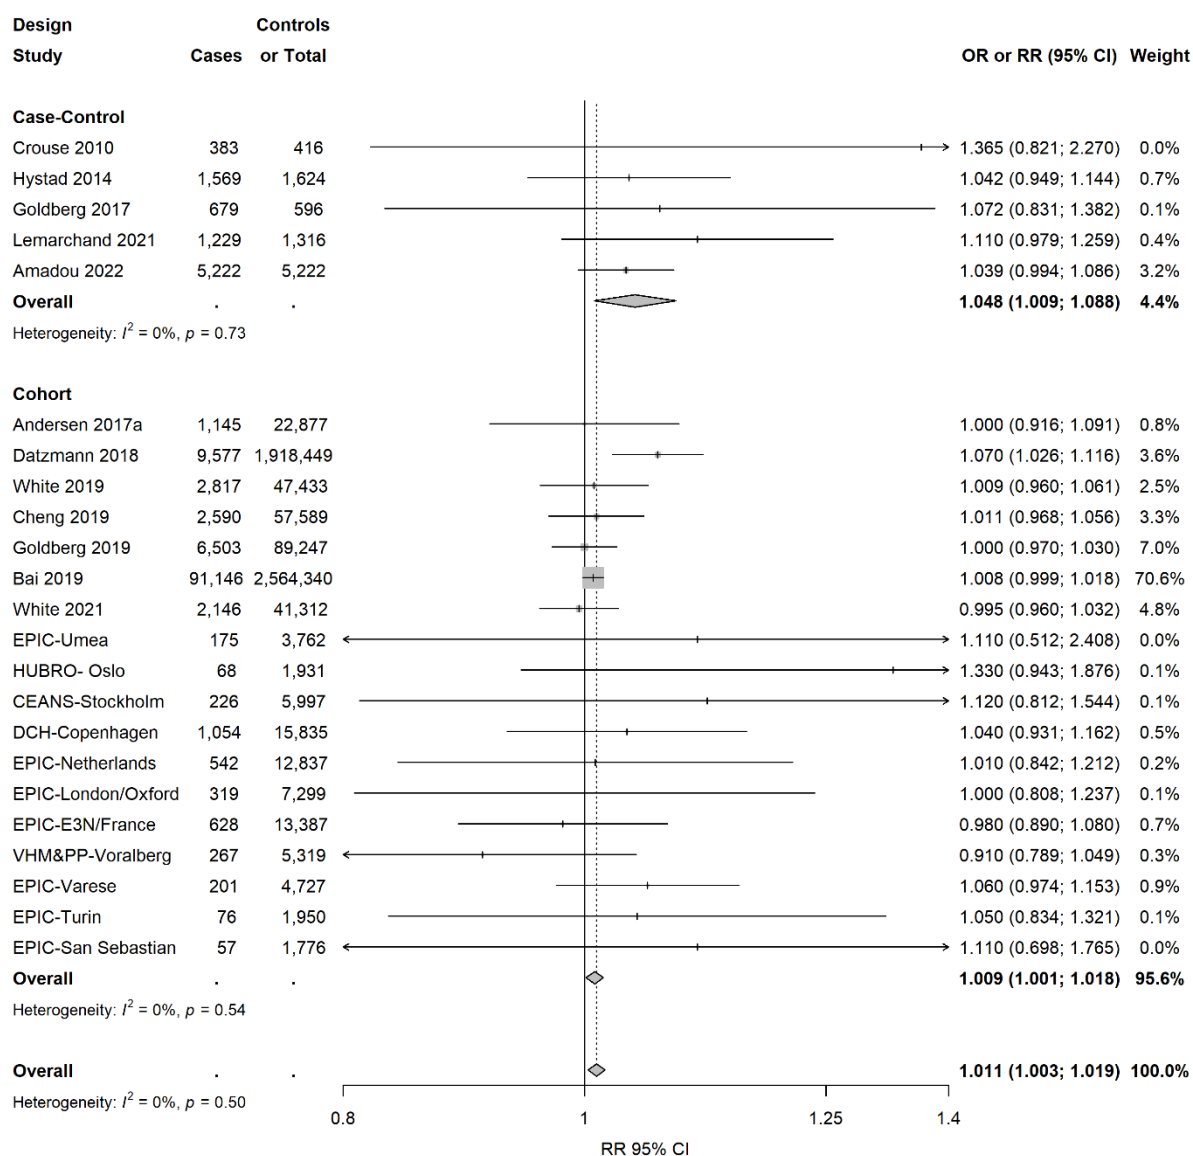

**Figure S1: Study-specific and summary RRs and 95% confidence intervals for the association between invasive breast cancer and exposure to an increase of 10  $\mu\text{g}/\text{m}^3$  in  $\text{NO}_2$  including studies of the ESCAPE project individually.**
